# Supplementary material for: An inkjet printing paper-based immunodevice for fluorescence determination of immunoglobulin G
Source: Royal Society of Chemistry journal article supplement (doi:10.1039/c9ay00893d), 2019-01-01
Supplement: c9ay00893d1.pdf [file c9ay00893d1.pdf]

## Supplementary Material

### **Inkjet printing paper-based immunodevice for fluorescence determination of Immunoglobulin G**

**Xiao-yan Guo<sup>a</sup>, Ying Chen<sup>a</sup>, Liu Zhang<sup>a</sup> and Wei Liu<sup>ID\*ab</sup>**

*School of Chemistry and Chemical Engineering, Shaanxi Normal University, Xi'an, 710062, PR*

*China*

*Key Laboratory of Analytical Chemistry for Life Science of Shaanxi Province,*

\* Authors to whom correspondence should be addressed; E-mail: weiliu@126.com;  
liuwei2@hotmail.com

## Results and discussion

### Exploration of printing results with different sizes of nanoparticles

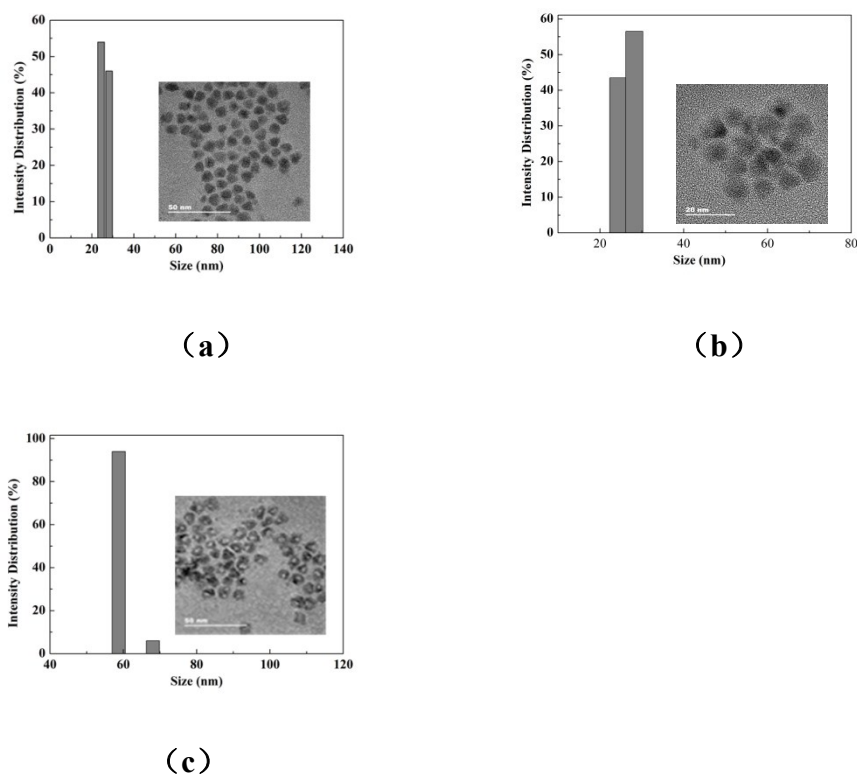

**Fig.S1** TEM image and DLS result of (a) IgG capture antibody, (b) IgG, (c) CdTe QD labeled detection antibody.

### Optimization of immunoassay conditions

In the immunoassay procedure, we examined the effect of the concentration of the capture antibody. The concentration of BSA (0.05%), detection antibody ( $50 \mu\text{g mL}^{-1}$ ) and IgG ( $20 \text{ ng mL}^{-1}$ ) were fixed. The concentration of the capture antibody was examined in the range of  $10\text{-}60 \mu\text{g mL}^{-1}$  (Fig. S2a). When the concentration of capture antibody was below  $30 \mu\text{g mL}^{-1}$ , the fluorescence intensity increased with the increasing concentration of capture antibody. The FL intensity decreased when the concentration was higher than  $30 \mu\text{g mL}^{-1}$ . Therefore,  $30 \mu\text{g mL}^{-1}$  was selected as the optimal concentration of the capture antibody.

With the optimal concentration of capture antibody ( $30 \mu\text{g mL}^{-1}$ ), detection

antibody ( $50 \mu\text{g mL}^{-1}$ ), and IgG ( $20 \text{ ng mL}^{-1}$ ), the effect of BSA concentration on the immunoassay was investigated in the range of 0.01-0.1%. As shown in Fig. S2b, the FL intensity increased with the increasing concentration of BSA in the range of 0.01-0.1% and the FL intensity increased to a maximum level at 0.05% of the BSA. After that, the FL intensity decreased with the increasing of BSA in the range of 0.05 to 0.1%. Thus, 0.05% was used as the optimal concentration of BSA for the further immunoassay study.

In the immunoassay, detection antibody has a great effect on the detection results since it can directly affect the FL intensity. We examined the effect of detection antibody concentration in the range of 40-90  $\mu\text{g mL}^{-1}$  on the immunoassay (Fig. S2c). The results showed that, with the increasing of detection antibody concentration in the range of 40-70  $\mu\text{g mL}^{-1}$ , the FL intensity gradually increased to maximum value at 70  $\mu\text{g mL}^{-1}$ . The FL intensity decreased when the concentration of detection antibody was higher than 70  $\mu\text{g mL}^{-1}$ . So, 70  $\mu\text{g mL}^{-1}$  was chosen as the suitable concentration of detection antibody in the immunoassay.

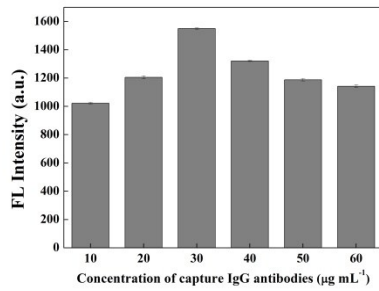

(a)

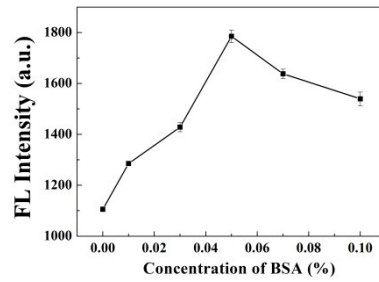

(b)

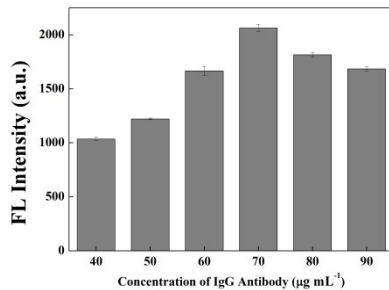

(c)

**Fig. S2** Parameter optimization of (a) Effect of the capture antibody concentration on the immunoassay; (b) Effect of BSA concentration on the immunoassay; (c) Effect of detection antibody concentration on the immunoassay.
